# Supplementary material
Source: PubMed Central journal article supplement (PMC2923352)
Supplement: fj.09-152488_1.pdf [file fj.09-152488_1.pdf]

## SUPPLEMENTARY MATERIALS

### **Dietary and genetic evidence for phosphate toxicity accelerating mammalian aging**

**Mutsuko Ohnishi MD, PhD<sup>1</sup>, M. Shawkat Razzaque MD, PhD<sup>1,2</sup>**

<sup>1</sup> Department of Oral Medicine, Infection and Immunity, Harvard School of Dental Medicine, Boston, MA, USA; <sup>2</sup> Department of Pathology, Nagasaki University Graduate School of Biomedical Sciences, Nagasaki, Japan

## Supplementary Figure 1

### Expression of NaPi2a

Immunostaining for NaPi2a in kidney sections prepared from wild-type (WT) and *klotho*<sup>-/-</sup> mice using a polyclonal antibody, as previously published (S1, S2). In contrast to WT kidney, there is markedly increased expression of NaPi2a in kidney sections from *klotho*<sup>-/-</sup> mice, located mostly at the luminal side of the proximal tubular epithelial cells (arrows) (magnification 20X).

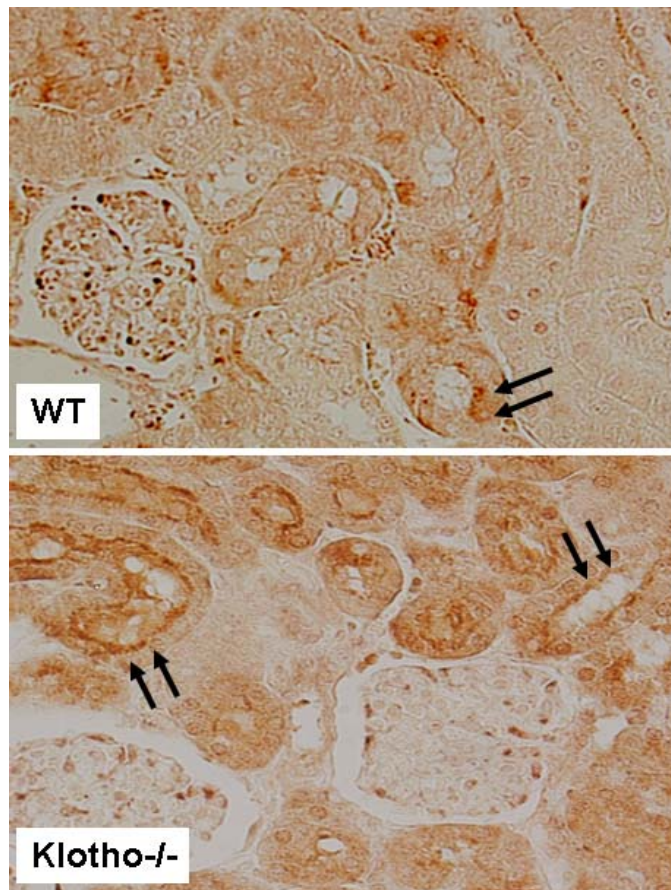

## Supplementary Figure 2

### Gross and histological features of testes

Testes obtained from wild-type (WT) mice, *klotho*<sup>-/-</sup> mice, *NaPi2a*<sup>-/-</sup>/*klotho*<sup>-/-</sup> mice fed with a normal-phosphate diet (DKO+NPD) and *NaPi2a*<sup>-/-</sup>/*klotho*<sup>-/-</sup> mice fed with a high-phosphate diet (DKO+HPD). Please note that, compared to DKO+NPD, testes are smaller in DKO+HPD mice and somewhat similar to hyperphosphatemic *klotho*<sup>-/-</sup> mice (upper panel). The animals are of similar age. The obtained testes are fixed in 10% formalin for at least 24 hours and then processed in the paraffin before sectioning and staining as detailed earlier (S3). Hematoxylin and eosin-stained sections of testes from 11-week-old WT mice, *klotho*<sup>-/-</sup> mice, DKO+NPD and DKO+HPD. When compared to DKO+NPD mice, there is diffuse atrophy of seminiferous tubules in testes of DKO+HPD mice with the resultant effect being infertility (magnification 20X).

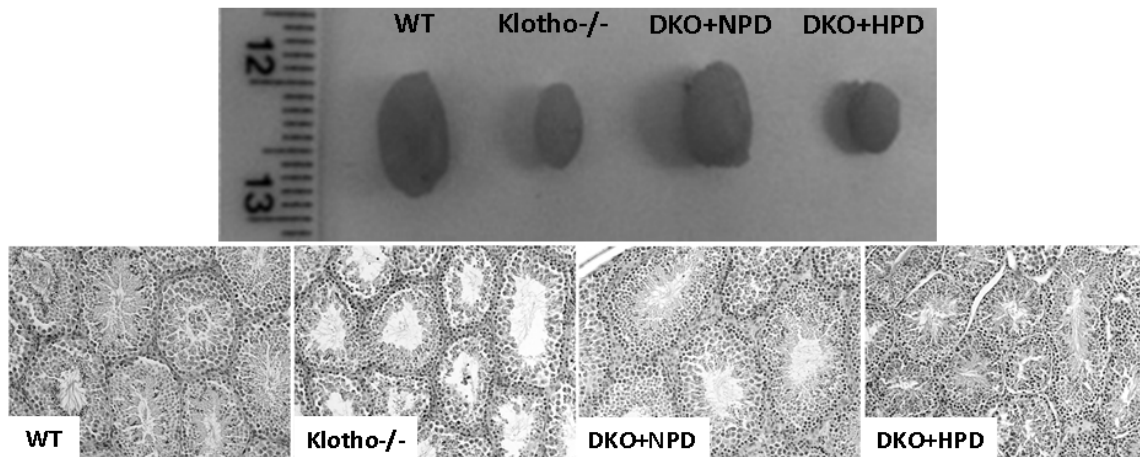

### Supplementary Figure 3

#### Gross appearance of spleen

Spleens obtained from wild-type (WT) mice, *klotho*<sup>-/-</sup> mice, *NaPi2a*<sup>-/-</sup>/*klotho*<sup>-/-</sup> mice fed with a normal-phosphate diet (DKO+NPD) and *NaPi2a*<sup>-/-</sup>/*klotho*<sup>-/-</sup> mice fed with a high-phosphate diet (DKO+HPD). Note that, compared to DKO+NPD, the spleen is smaller in DKO+HPD mice, which is similar to hyperphosphatemic *klotho*<sup>-/-</sup> mice. The animals were matched for similar ages (11 week-old) and sexes.

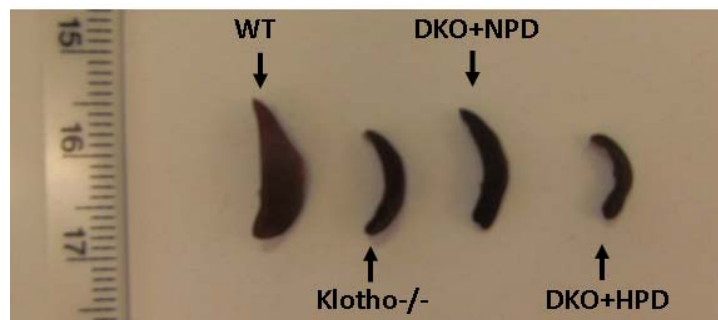

## Supplementary Figure 4

### Ectopic lung calcification

Lung sections prepared from wild-type (WT) mice, *klotho*<sup>-/-</sup> mice, *NaPi2a*<sup>+/-</sup>/*klotho*<sup>+/-</sup> mice fed with a normal-phosphate diet (DKO+NPD) and *NaPi2a*<sup>+/-</sup>/*klotho*<sup>+/-</sup> mice fed with a high-phosphate diet (DKO+HPD), showing pulmonary calcifications (*arrows*) in hyperphosphatemic *klotho*<sup>-/-</sup> mice. Inactivation of *NaPi2a* in *klotho*<sup>-/-</sup> mice eliminates this calcification from DKO+NPD mice. However, pulmonary calcification (*arrows*) reappears in DKO+HPD mice, suggesting that phosphate toxicity induces pulmonary calcification (von Kossa staining; magnification 20X).

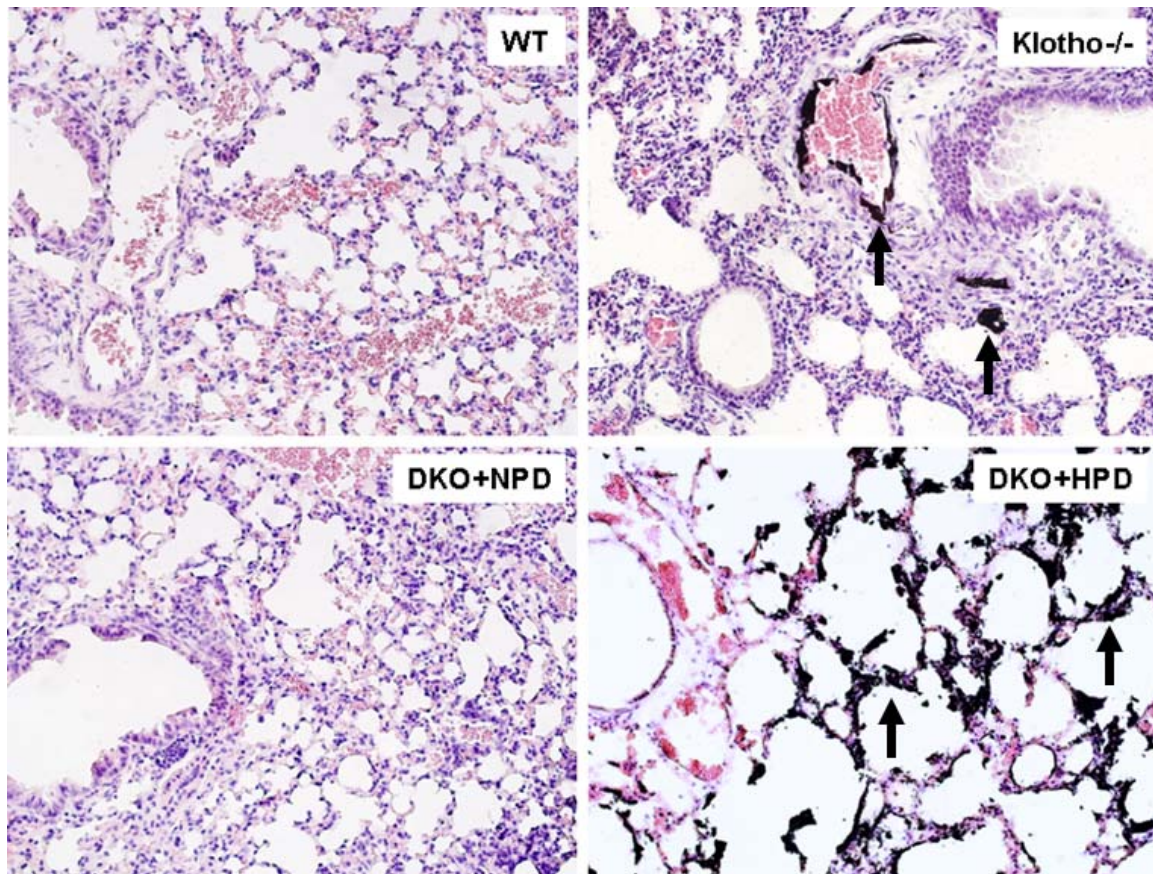

## Supplementary Figure 5

### Serum 1,25 dehydroxyvitamin D levels

Serum 1,25 dehydroxyvitamin D levels in wild-type (WT), *klotho*<sup>-/-</sup> and *NaPi2a*<sup>-/-</sup>/*klotho*<sup>-/-</sup> mice fed with either a normal-phosphate diet (DKO+NPD) or a high-phosphate diet (DKO+HPD). Serum 1,25 dehydroxyvitamin D levels are significantly higher in *klotho*<sup>-/-</sup> mice (n=6) when compared to WT mice (n=6), a pattern consistent with our earlier reported observations (S4, S5). Increased serum 1,25 dehydroxyvitamin D levels are also observed in DKO+NPD (n=9) and DKO+HPD (n=4) mice compared to WT controls (\*:  $p < 0.05$ , vs. WT; \*\*:  $p < 0.01$ , vs. WT).

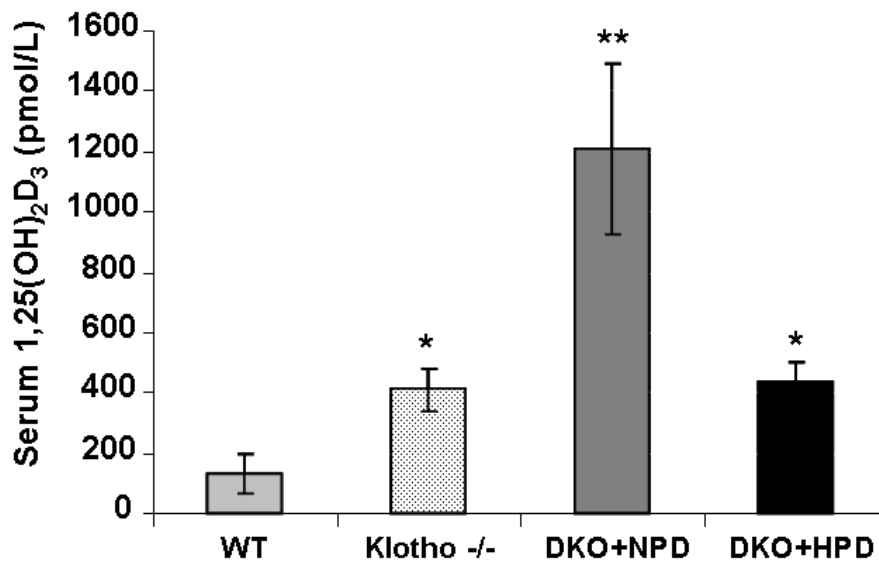

## REFERENCES

- S1.** Ohnishi, M., Nakatani, T., Lanske, B., and Razzaque, M. S. (2009) Reversal of mineral ion homeostasis and soft-tissue calcification of klotho knockout mice by deletion of vitamin D 1alpha-hydroxylase. *Kidney Int* 75, 1166-1172.
- S2.** Nakatani, T., Bara, S., Ohnishi, M., Densmore, M. J., Taguchi, T., Goetz, R., Mohammadi, M., Lanske, B., and Razzaque, M. S. (2009) In vivo genetic evidence of klotho-dependent functions of FGF23 in regulation of systemic phosphate homeostasis. *FASEB J* 23, 433-441.
- S3.** Zha, Y., Le, V. T., Higami, Y., Shimokawa, I., Taguchi, T., and Razzaque, M. S. (2006) Life-long suppression of growth hormone-insulin-like growth factor I activity in genetically altered rats could prevent age-related renal damage. *Endocrinology* 147, 5690-5698.
- S4.** Ohnishi, M., Nakatani, T., Lanske, B., and Razzaque, M. S. (2009) In vivo genetic evidence for suppressing vascular and soft-tissue calcification through the reduction of serum phosphate levels, even in the presence of high serum calcium and 1,25-Dihydroxyvitamin D levels. *Circ Cardiovasc Genet* 2, 583-590.
- S5.** Nakatani, T., Ohnishi, M., and Razzaque, M. S. (2009) Inactivation of klotho function induces hyperphosphatemia even in presence of high serum fibroblast growth factor 23 levels in a genetically engineered hypophosphatemic (Hyp) mouse model. *FASEB J* 23, 3702-3711.
